# Supplementary material
Source: PubMed Central journal article supplement (PMC2174865)
Supplement: plntcell_tpc.106.048900_1.pdf [file plntcell_tpc.106.048900_1.pdf]

Supplemental Data. Zhao et al. 2007. SAD2, an importin  $\beta$ -like protein, is required for UV-B response in *Arabidopsis* by mediating MYB4 nuclear trafficking.

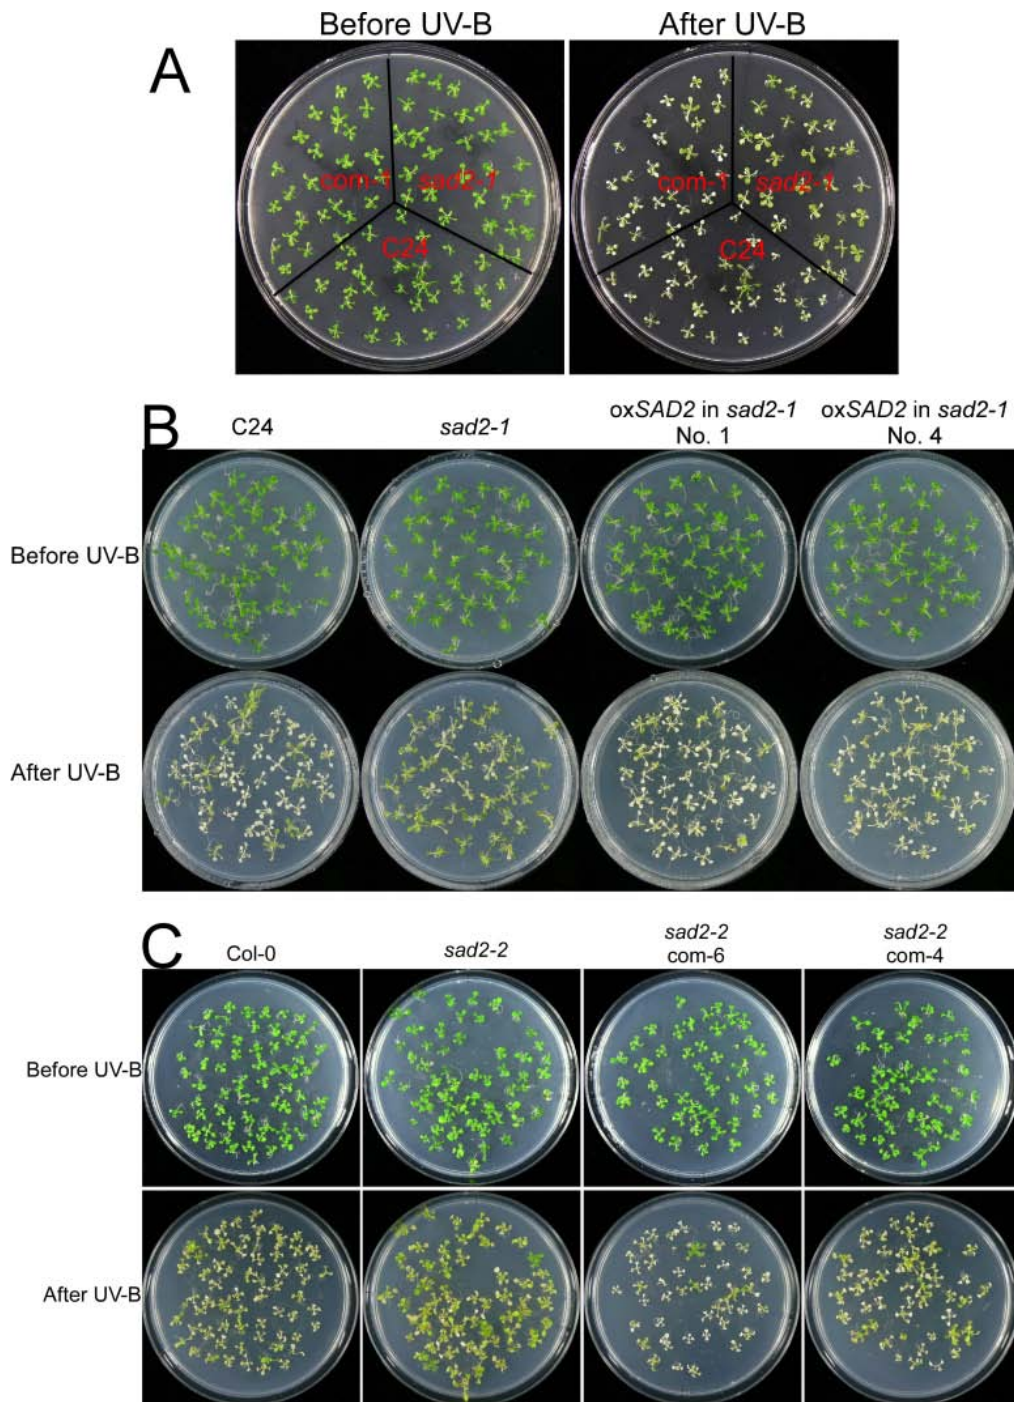

**Supplemental Figure 1. Complementation of *sad2* mutants by the *SAD2* gene.**

(A) Twelve-day-old seedlings of wild type, *sad2-1*, and a *sad2-1* complemented line (com-1) were treated with UV-B (5.3 mW/cm<sup>2</sup>) for 10 min. Photographs were taken after a three-day incubation in the growth chamber.

(B) Twelve-day-old seedlings of wild type, *sad2-1*, and two *35S:SAD2* transgenic lines (in the *sad2-1* mutant) were treated with UV-B (5.3 mW/cm<sup>2</sup>) for 10 min. Photographs were taken after a three-day incubation in the growth chamber.

(C) Twelve-day-old seedlings of Col-0, *sad2-2*, and two *sad2-2* complemented line (com-4 and com-6) were treated with UV-B (5.3 mW/cm<sup>2</sup>) for 12 min. Photographs were taken after a three-day incubation in the growth chamber.

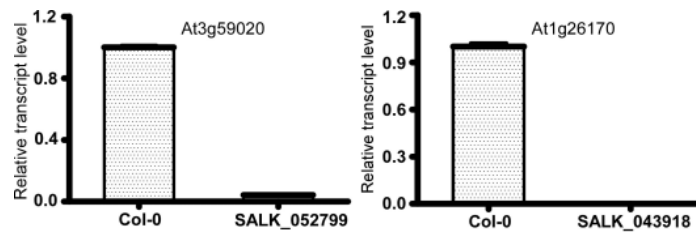

**Supplemental Figure 2. Expression of SAD2 homologs At3g59020 and At1g26170 in wild type and their corresponding mutants SALK\_052799 and SALK\_043918.**

Total RNA was extracted from 12-day-old seedlings of wild type and the mutants. The resulting cDNAs were used for quantitative real time PCR analysis. Error bars indicate SD (n=3).

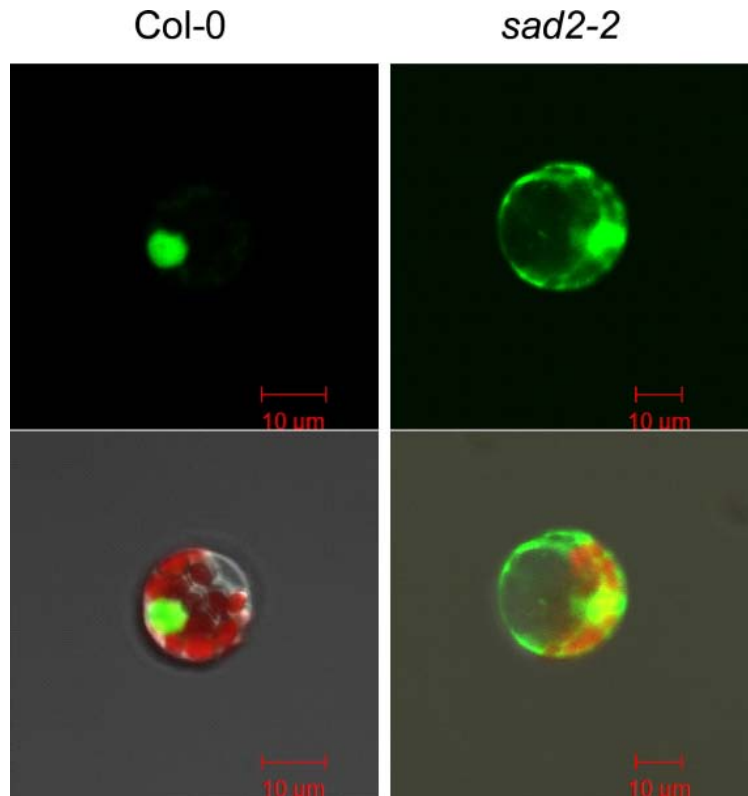

**Supplemental Figure 3. Transient expression of *MYB4-GFP* in wild-type and *sad2-2* protoplasts.**

*MYB4-GFP* nuclear localization in wild-type (left) or *sad2-2* mutant (right) protoplasts.

Top panels, confocal GFP images; low panels, combined bright-field, chloroplast autofluorescence and GFP images.

(Left) A protoplast showing typical nuclear localized *MYB4-GFP* in wild type.

(Right) A protoplast showing nuclear and cytoplasmic localized *MYB4-GFP* in the *sad2-2* mutant.

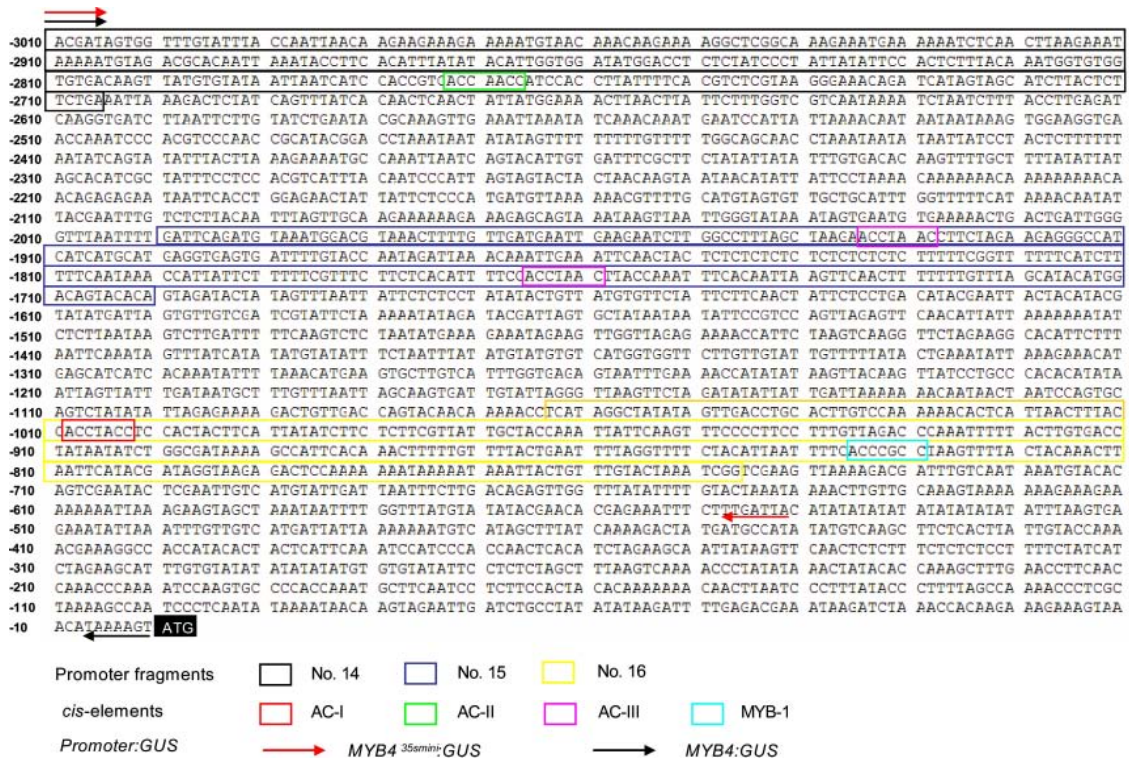

Supplemental Figure 4. A schematic representation of MYB4 binding *cis*-elements in the MYB4 5' upstream sequence.
